# Supplementary material for: Different autonomous myogenic cell populations revealed by ablation of Myf5-expressing cells during mouse embryogenesis
Source: Oxford University Press journal article supplement (doi:10.1242/dev.019331), 2008-03-26
Supplement: dev019331-sup-019331-tables1.pdf [file dev019331-sup-019331-tables1.pdf]

| Gene Title                                              | Gene Symbol | Probeset     | Change | Log Ratio | Change | Control Signal | Control Detection | Control Detection | p-Value  | Myf5-Cre/DT-A Signal | Myf5-Cre/DT-A Detection | Myf5-Cre/DT-A Detection | p-Value  | Unigene(Avadis) | Entrez Gene | Ensembl             |
|---------------------------------------------------------|-------------|--------------|--------|-----------|--------|----------------|-------------------|-------------------|----------|----------------------|-------------------------|-------------------------|----------|-----------------|-------------|---------------------|
| bone morphogenetic protein 4                            | Bmp4        | 1422912_at   | 0,2    | NC        | 167,5  | P              |                   |                   | 0,001953 | 140,5                | P                       |                         | 0,001221 | Mm.6813         | 12159       | ENSMUSG000000021835 |
| desmin                                                  | Des         | 1426731_at   | -1,3   | D         | 263,1  | P              |                   |                   | 0,000732 | 606,2                | P                       |                         | 0,000244 | Mm.6712         | 13346       | ENSMUSG000000026208 |
| dystrophin, muscular dystrophy                          | Dmd         | 1448665_at   | -0,4   | NC        | 99,8   | P              |                   |                   | 0,000244 | 150,6                | P                       |                         | 0,000244 | Mm.275608       | 13405       |                     |
| dystrophin, muscular dystrophy                          | Dmd         | 1417307_at   | -0,2   | NC        | 104,5  | P              |                   |                   | 0,000244 | 139,2                | P                       |                         | 0,000244 | Mm.275608       | 13405       |                     |
| dystrophin, muscular dystrophy                          | Dmd         | 1430320_at   | 0,2    | NC        | 10,2   | P              |                   |                   | 0,000732 | 7                    | P                       |                         | 0,01416  | Mm.275608       | 13405       |                     |
| dystrobrevin binding protein 1                          | Dtnbp1      | 1431619_a_a  | -0,1   | NC        | 150,8  | P              |                   |                   | 0,000244 | 155,7                | P                       |                         | 0,000244 | Mm.352311       | 94245       | ENSMUSG000000057531 |
| Forhead box P1                                          | Foxp1       | 1447209_at   | 0,1    | NC        | 53,6   | P              |                   |                   | 0,000244 | 50,4                 | P                       |                         | 0,000244 | Mm.234965       | 108655      |                     |
| forkhead box P1                                         | Foxp1       | 1421141_a_at | 0,2    | NC        | 94,7   | P              |                   |                   | 0,000244 | 72,8                 | P                       |                         | 0,000244 | Mm.234965       | 108655      |                     |
| forkhead box P1                                         | Foxp1       | 1435222_at   | 0,2    | NC        | 297,3  | P              |                   |                   | 0,000244 | 249,7                | P                       |                         | 0,000244 | Mm.234965       | 108655      |                     |
| Forhead box P1                                          | Foxp1       | 1446280_at   | 0,3    | NC        | 47,4   | P              |                   |                   | 0,00415  | 38,2                 | P                       |                         | 0,001953 | Mm.234965       | 108655      |                     |
| forkhead box P1                                         | Foxp1       | 1421140_a_at | 0,3    | NC        | 194,4  | P              |                   |                   | 0,000244 | 161,7                | P                       |                         | 0,000244 | Mm.234965       | 108655      | ENSMUSG000000030067 |
| forkhead box P1                                         | Foxp1       | 1455242_at   | 0,3    | NC        | 329,4  | P              |                   |                   | 0,000244 | 292,7                | P                       |                         | 0,000244 | Mm.234965       | 108655      |                     |
| Forhead box P1                                          | Foxp1       | 1438802_at   | 0,4    | NC        | 46,9   | P              |                   |                   | 0,000244 | 39,7                 | P                       |                         | 0,000244 | Mm.234965       | 108655      |                     |
| Forhead box P1                                          | Foxp1       | 1445277_at   | 0,4    | NC        | 20,3   | A              |                   |                   | 0,080566 | 15,4                 | P                       |                         | 0,030273 | Mm.401795       | 108655      |                     |
| forkhead box P1                                         | Foxp1       | 1421142_s_at | 0,4    | NC        | 84,7   | P              |                   |                   | 0,000244 | 56,1                 | P                       |                         | 0,000244 | Mm.234965       | 108655      |                     |
| forkhead box P2                                         | Foxp2       | 1422014_at   | -0,3   | NC        | 27,3   | A              |                   |                   | 0,067627 | 24,9                 | P                       |                         | 0,01416  | Mm.432481       | 114142      | ENSMUSG000000029563 |
| forkhead box P2                                         | Foxp2       | 1441365_at   | -0,2   | NC        | 16,4   | P              |                   |                   | 0,005859 | 22,5                 | P                       |                         | 0,00415  |                 | 114142      |                     |
| forkhead box P2                                         | Foxp2       | 1458191_at   | -0,2   | NC        | 34,4   | P              |                   |                   | 0,000244 | 44,1                 | P                       |                         | 0,000244 | Mm.432481       | 114142      |                     |
| forkhead box P2                                         | Foxp2       | 1440108_at   | -0,2   | NC        | 84,8   | P              |                   |                   | 0,000732 | 86,7                 | P                       |                         | 0,000244 | Mm.432481       | 114142      | ENSMUSG000000029563 |
| forkhead box P2                                         | Foxp2       | 1438232_at   | -0,1   | NC        | 161,1  | P              |                   |                   | 0,000244 | 160,5                | P                       |                         | 0,000244 | Mm.432481       | 114142      | ENSMUSG000000029563 |
| forkhead box P2                                         | Foxp2       | 1438231_at   | 0,1    | NC        | 96,2   | P              |                   |                   | 0,000244 | 88,4                 | P                       |                         | 0,000244 | Mm.432481       | 114142      | ENSMUSG000000029563 |
| Follistatin                                             | Fst         | 1434458_at   | -0,1   | NC        | 113,6  | P              |                   |                   | 0,000244 | 120,4                | P                       |                         | 0,000244 | Mm.425842       | 14313       |                     |
| follistatin                                             | Fst         | 1421365_at   | 0,1    | NC        | 99,5   | P              |                   |                   | 0,023926 | 95,7                 | P                       |                         | 0,023926 | Mm.425842       | 14313       | ENSMUSG000000021765 |
| lectin, galactose binding, soluble 1                    | Lgals1      | 1455439_a_a  | 0      | NC        | 4727   | P              |                   |                   | 0,000244 | 4785,7               | P                       |                         | 0,000244 | Mm.43831        | 16852       | ENSMUSG000000068220 |
| lectin, galactose binding, soluble 1                    | Lgals1      | 1419573_a_a  | 0      | NC        | 2655,3 | P              |                   |                   | 0,000244 | 2902,7               | P                       |                         | 0,000244 | Mm.43831        | 16852       | ENSMUSG000000068220 |
| muscleblind-like 1 (Drosophila)                         | Mbnl1       | 1440315_at   | -0,2   | NC        | 6      | P              |                   |                   | 0,010742 | 6                    | P                       |                         | 0,008057 | Mm.255723       | 56758       |                     |
| muscleblind-like 1 (Drosophila)                         | Mbnl1       | 1416904_at   | 0      | NC        | 1084   | P              |                   |                   | 0,000244 | 1078,9               | P                       |                         | 0,000244 |                 | 56758       | ENSMUSG000000027763 |
| Muscleblind-like 3 (Drosophila)                         | Mbnl3       | 1442664_at   | -0,3   | NC        | 11,1   | P              |                   |                   | 0,030273 | 11                   | P                       |                         | 0,005859 | Mm.295324       | 171170      |                     |
| muscleblind-like 3 (Drosophila)                         | Mbnl3       | 1422836_at   | 0,1    | NC        | 87,1   | P              |                   |                   | 0,001221 | 70,8                 | P                       |                         | 0,000244 | Mm.295324       | 171170      |                     |
| muscleblind-like 3 (Drosophila)                         | Mbnl3       | 1434678_at   | 0,1    | NC        | 271    | P              |                   |                   | 0,000244 | 243,6                | P                       |                         | 0,000244 | Mm.295324       | 171170      |                     |
| Muscleblind-like 3 (Drosophila)                         | Mbnl3       | 1441530_at   | 0,5    | NC        | 28,6   | P              |                   |                   | 0,010742 | 18,4                 | M                       |                         | 0,056152 | Mm.295324       | 171170      |                     |
| Muscleblind-like 3 (Drosophila)                         | Mbnl3       | 1443383_at   | 0,5    | NC        | 22,6   | P              |                   |                   | 0,001953 | 22,3                 | P                       |                         | 0,001221 | Mm.295324       | 171170      |                     |
| muscleblind-like 3 (Drosophila)                         | Mbnl3       | 1442549_at   | 0,6    | NC        | 74,3   | P              |                   |                   | 0,001221 | 58,8                 | P                       |                         | 0,005859 | Mm.295324       | 171170      |                     |
| myocyte enhancer factor 2C                              | Mef2c       | 1451507_at   | -1     | D         | 144,7  | P              |                   |                   | 0,000732 | 299                  | P                       |                         | 0,000244 | Mm.428347       | 17260       |                     |
| myocyte enhancer factor 2C                              | Mef2c       | 1424852_at   | -0,9   | NC        | 243,7  | P              |                   |                   | 0,000732 | 441,6                | P                       |                         | 0,000244 | Mm.428347       | 17260       |                     |
| myocyte enhancer factor 2C                              | Mef2c       | 1421027_a_a  | -0,8   | NC        | 332,5  | P              |                   |                   | 0,000244 | 588,4                | P                       |                         | 0,000244 | Mm.24001        | 17260       | ENSMUSG00000005583  |
| myocyte enhancer factor 2C                              | Mef2c       | 1451506_at   | -0,7   | NC        | 182,8  | P              |                   |                   | 0,005859 | 373,3                | P                       |                         | 0,000244 | Mm.24001        | 17260       |                     |
| myocyte enhancer factor 2C                              | Mef2c       | 1421028_a_a  | -0,7   | NC        | 167    | P              |                   |                   | 0,000244 | 271                  | P                       |                         | 0,000244 | Mm.24001        | 17260       | ENSMUSG00000005583  |
| Myocyte enhancer factor 2C                              | Mef2c       | 1439946_at   | -0,4   | NC        | 39,7   | P              |                   |                   | 0,008057 | 55,7                 | P                       |                         | 0,001953 | Mm.24001        | 17260       |                     |
| Myocyte enhancer factor 2C                              | Mef2c       | 1445420_at   | -0,4   | NC        | 29,5   | P              |                   |                   | 0,000732 | 34,2                 | P                       |                         | 0,000244 | Mm.24001        | 17260       |                     |
| Myocyte enhancer factor 2C                              | Mef2c       | 1446484_at   | -0,2   | NC        | 56,6   | P              |                   |                   | 0,001221 | 65,1                 | P                       |                         | 0,001221 | Mm.24001        | 17260       |                     |
| homeo box, msh-like 1                                   | Msx1        | 1448601_s_at | 0,2    | NC        | 40,8   | P              |                   |                   | 0,001953 | 37,5                 | P                       |                         | 0,023926 | Mm.256509       | 17701       | ENSMUSG000000048450 |
| myogenic factor 5                                       | Myf5        | 1420757_at   | -1,5   | D         | 8,8    | A              |                   |                   | 0,080566 | 42,5                 | P                       |                         | 0,000244 | Mm.4984         | 17877       | ENSMUSG00000000435  |
| myogenic factor 6                                       | Myf6        | 1419150_at   | -1,8   | D         | 33,8   | P              |                   |                   | 0,008057 | 146,4                | P                       |                         | 0,000732 | Mm.11           | 17878       | ENSMUSG000000035923 |
| myogenic differentiation 1                              | Myod1       | 1418420_at   | -0,5   | NC        | 106,5  | P              |                   |                   | 0,010742 | 157,2                | P                       |                         | 0,001953 | Mm.1526         | 17927       | ENSMUSG000000009471 |
| myogenin                                                | Myog        | 1419391_at   | -0,8   | NC        | 294    | P              |                   |                   | 0,000244 | 465,5                | P                       |                         | 0,000244 | Mm.16528        | 17928       | ENSMUSG000000026459 |
| myomesin 2                                              | Myom2       | 1438175_x_at | -1,5   | D         | 75,7   | P              |                   |                   | 0,001221 | 266,2                | P                       |                         | 0,000732 | Mm.272115       | 17930       | ENSMUSG000000031461 |
| myomesin 2                                              | Myom2       | 1457435_x_a  | -1,4   | D         | 358,1  | P              |                   |                   | 0,000244 | 948,7                | P                       |                         | 0,000244 | Mm.272115       | 17930       | ENSMUSG000000031461 |
| myomesin 2                                              | Myom2       | 1450917_at   | -1,4   | D         | 134,2  | P              |                   |                   | 0,008057 | 355,2                | P                       |                         | 0,000732 | Mm.272115       | 17930       | ENSMUSG000000031461 |
| Neurofibromatosis 1                                     | Nf1         | 1460055_at   | 0      | NC        | 9,9    | P              |                   |                   | 0,046143 | 7,1                  | P                       |                         | 0,001953 | Mm.255596       | 18015       |                     |
| neurofibromatosis 1                                     | Nf1         | 1438067_at   | 0,4    | NC        | 56,4   | P              |                   |                   | 0,001953 | 45,2                 | P                       |                         | 0,00293  |                 | 18015       | ENSMUSG000000020716 |
| Neurofibromatosis 1                                     | Nf1         | 1443894_at   | 0,5    | NC        | 43,5   | P              |                   |                   | 0,01416  | 34,6                 | P                       |                         | 0,01416  | Mm.255596       | 18015       |                     |
| p21 (CDKN1A)-activated kinase 1                         | Pak1        | 1420979_at   | -0,3   | NC        | 81     | P              |                   |                   | 0,000732 | 90,2                 | P                       |                         | 0,000732 | Mm.260227       | 18479       | ENSMUSG000000030774 |
| p21 (CDKN1A)-activated kinase 1                         | Pak1        | 1420980_at   | -0,1   | NC        | 95     | P              |                   |                   | 0,000732 | 104,5                | P                       |                         | 0,000244 | Mm.260227       | 18479       | ENSMUSG000000030774 |
| p21 (CDKN1A)-activated kinase 1                         | Pak1        | 1450070_s_at | 0,1    | NC        | 132    | P              |                   |                   | 0,000244 | 136,7                | P                       |                         | 0,000732 | Mm.260227       | 18479       | ENSMUSG000000030774 |
| PDZ and LIM domain 3                                    | Pdlim3      | 1449178_at   | -0,9   | NC        | 258,1  | P              |                   |                   | 0,001953 | 502,9                | P                       |                         | 0,000732 | Mm.282900       | 53318       | ENSMUSG000000031636 |
| PDZ and LIM domain 3                                    | Pdlim3      | 1443299_at   | -0,8   | NC        | 66,3   | P              |                   |                   | 0,000244 | 144,6                | P                       |                         | 0,000244 | Mm.282900       | 53318       |                     |
| protein phosphatase 3, catalytic subunit, alpha isoform | Ppp3ca      | 1452056_s_at | -0,2   | NC        | 170,5  | P              |                   |                   | 0,000244 | 186                  | P                       |                         | 0,000244 | Mm.331389       | 19055       | ENSMUSG000000028161 |
| protein phosphatase 3, catalytic subunit, alpha isoform | Ppp3ca      | 1426401_at   | -0,1   | NC        | 281,6  | P              |                   |                   | 0,000244 | 313,4                | P                       |                         | 0,000244 | Mm.331389       | 19055       | ENSMUSG000000028161 |
| protein phosphatase 3, catalytic subunit, alpha isoform | Ppp3ca      | 1438478_a_a  | -0,1   | NC        | 172,6  | P              |                   |                   | 0,000732 | 217                  | P                       |                         | 0,000244 | Mm.331389       | 19055       | ENSMUSG000000028161 |
| Protein phosphatase 3, catalytic subunit, alpha isoform | Ppp3ca      | 1440051_at   | 0,2    | NC        | 58,1   | P              |                   |                   | 0,000244 | 48,3                 | P                       |                         | 0,000732 | Mm.331389       | 19055       |                     |
| ras homolog gene family, member A                       | Rhoa        | 1437628_s_at | 0,1    | NC        | 951    | P              |                   |                   | 0,000244 | 887,9                | P                       |                         | 0,000244 | Mm.757          | 11848       | ENSMUSG000000007815 |
| sonic hedgehog                                          | Shh         | 1436869_at   | -0,6   | NC        | 121,7  | P              |                   |                   | 0,000244 | 240,8                | P                       |                         | 0,000732 | Mm.57202        | 20423       | ENSMUSG00000002633  |
| sine oculis-related homeobox 1 homolog (Drosophila)     | Six1        | 1427277_at   | -0,8   | NC        | 24,6   | P              |                   |                   | 0,000244 | 51,5                 | P                       |                         | 0,000244 | Mm.4645         | 20471       | ENSMUSG000000051367 |
| sine oculis-related homeobox 4 homolog (Drosophila)     | Six4        | 1456862_at   | -0,6   | NC        | 21,3   | P              |                   |                   | 0,00415  | 43,4                 | P                       |                         | 0,000732 | Mm.249575       | 20474       |                     |
| sine oculis-related homeobox 4 homolog (Drosophila)     | Six4        | 1425767_a_a  | -0,2   | NC        | 50,4   | P              |                   |                   | 0,001953 | 59,4                 | P                       |                         | 0,001953 | Mm.249575       | 20474       | ENSMUSG000000034460 |
| sine oculis-related homeobox 4 homolog (Drosophila)     | Six4        | 1439753_x_a  | -0,2   | NC        | 26,8   | P              |                   |                   | 0,010742 | 38,8                 | P                       |                         | 0,001221 | Mm.249575       | 20474       |                     |
| serum response factor                                   | Srf         | 1418255_s_at | -0,6   | NC        | 124,2  | P              |                   |                   | 0,000244 | 170,7                | P                       |                         | 0,000244 | Mm.45044        | 20807       | ENSMUSG000000015605 |
| serum response factor                                   | Srf         | 1418256_at   | -0,1   | NC        | 112,2  | M              |                   |                   | 0,056152 | 126,1                | P                       |                         | 0,023926 | Mm.45044        | 20807       | ENSMUSG000000015605 |
| serine/arginine-rich protein specific kinase 3          | Srpk3       | 1447806_s_at | -1     | NC        | 201,7  | P              |                   |                   | 0,00415  | 388,2                | P                       |                         | 0,00293  | Mm.111904       | 56504       | ENSMUSG000000020007 |
| serine/arginine-rich protein specific kinase 3          | Srpk3       | 1418798_s_at |        |           |        |                |                   |                   |          |                      |                         |                         |          |                 |             |                     |
